# Supplementary material
Source: PubMed Central journal article supplement (PMC7883903)

## Online Data Supplement

### A Risk Prediction Model for Mortality Among Smokers in the COPCGene® Study

#### Appendix A. Candidate predictors and model selection

Variables considered in initial models included the following: demographic (age, height, weight, BMI, race), behavioral (current smoking, pack-years, years since quit), comorbidities [separate composite scores for CVD, cancer, bones and joints, stroke or Transient Ischemic Attack (TIA)], disease indicators (diabetes, high cholesterol, macular degeneration, gastroesophageal reflux, stomach ulcers and asthma), medication uses, lung (FEV<sub>1</sub>, FVC, FEV<sub>1</sub>/FVC), CT [Pi10, sAWT, wall area percent, Perc15 (15<sup>th</sup> percentile of the density histogram) on inspiratory and expiratory scans, volume-adjusted lung density, total lung volume (TLV), PRM variables (functional small airway disease and emphysema), functional residual capacity (FRC)], visual CT variables (emphysema, paraseptal emphysema, bronchial wall thickening), FVC/TLV (using TLV from CT), exacerbations, 6MWD, symptom scores (St. George Respiratory Questionnaire [SGRQ] variables, mMRC dyspnea score), chronic bronchitis. More detail about the quantitative and visual emphysema variables can be found in references 27, 31, 33, 45.

Preliminary analyses were performed using logistic regression to help manage variable selection using stepwise selection methods. Some model selection was then performed directly using the parametric survival models, with input from clinicians to ensure that at least one predictor from each major category was represented in the model. The adequacy of the final set of predictors was assessed by reviewing goodness-of-statistics such as time-dependent area under the curve statistics, diagnostic plots, and examining predictor impact using p-values corresponding to test statistics. The final set of predictors was also reviewed by clinicians for usefulness, plausibility and completeness.

Severe exacerbations and parametric response mapping (PRM) emphysema and gas trapping measures were significant in multivariable models but were not included in final models since many subjects did not have these measures at the time of analysis. ‘Years since quit’ was tested for addition but was insignificant in the model that already included the other two smoking variables (and other covariates), so was excluded. FEV<sub>1</sub>/FVC was included in initial models but excluded from final ones as it also contributed very little beyond the other predictors.

Interaction terms between final predictors were also assessed for inclusion in the model by using stepwise selection methods in logistic regression models (irrespective of time to event), using all 2-way interactions among the final set of 12 predictors. The interaction terms with largest impact were 6MWD\*current smoking status for men, and BMI\*age for women; given their relatively small contribution to the model as a whole and for ease of interpretation, interactions were not included in final models. Given that CT and exercise variables may be more difficult to obtain in many health centers, another set of models were fit that removed the distance walked, emphysema and airway wall thickening predictors.

## Appendix B. Determining point scores from the fitted survival model, with examples

Risk estimates can be determined for any time within 10 years using Equation (1) from the manuscript text; the required inputs are time  $t$ , and estimates of the linear predictor  $\mathbf{x}'_i\boldsymbol{\beta}$ , and the scale parameter  $\sigma$ . An alternative to computing the linear predictor directly is to approximate it using the point system, using Equation (2) in the text. Estimates of beta parameters from the Weibull model are naturally defined such that higher values increase survival likelihood. In order to make higher points reflect higher risk of mortality, a few adjustments were made in order to directly apply Equation (2). First, point scales were shifted for predictors to be non-positive (if necessary), and the adjusted intercept was then modified to compensate for this (indicated with the prime in Equation (3) below). The signs on these points were then removed (those shown in Tables 2 and S5) so that the corresponding point total was also nonnegative (“*– shifted point total<sub>i</sub>*” below). To compensate for this flip, the approximation becomes

$$\mathbf{x}'_i\boldsymbol{\beta} \approx \text{adjusted intercept}' - (-\text{shifted point total}_i) * S$$

Equation (3)

Equation (3) reexpresses Equation (2), but where “*– shifted point total<sub>i</sub>*” is obtained from Table 2 or Table S5. Once Equation (3) is applied, risk estimates can be computed based on Equation (1). Both the direct calculation of the linear predictor as well as the point approximation method using Equation (3) are illustrated below. For further detail on the calculations, please contact the corresponding author.

Example 1: 72.6 year-old female with CVD, an FEV1 of 0.969, BMI of 30.07, sAWT z-score of -0.818, distance walked of 1675 feet, former smoker with 49.5 pack-years, dyspnea score of 0, and ‘low’ visual emphysema score. Calculations would be as follows:

| <u>Predictor</u>           | <u>Subject value</u> | <u>Point approach</u> | <u><math>x'_i\beta</math> approach</u>           |
|----------------------------|----------------------|-----------------------|--------------------------------------------------|
| Intercept                  |                      |                       | 5.468337                                         |
| FEV <sub>1</sub> , % pred. | 0.969                | 0                     | + 2.680588(0.969) – 1.111009(0.969) <sup>2</sup> |
| Age, years                 | 72.6                 | 12                    | + 0.039362(72.6) – 0.000529(72.6) <sup>2</sup>   |
| BMI, kg/m <sup>2</sup>     | 30.07                | 2                     | + 0.094463(30.07) – 0.001205(30.07) <sup>2</sup> |
| sAWT z-score               | -0.818               | 2                     | + 0.085056(-0.818)                               |
| 6MWD, feet                 | 1675                 | 7                     | + 0.000681(1675)                                 |
| Dyspnea score              | 0                    | 0                     | – 0.082935(0)                                    |
| CT visual emphysema        | Low <sup>a</sup>     | 3                     | + 0.193291                                       |
| Current smoking            | No                   | 0                     | + 0                                              |
| Pack-years smoking         | 49.5                 | 2                     | – 0.002588(49.5)                                 |
| Diabetes                   | No                   | 0                     | + 0                                              |
| CVD                        | Yes                  | 2                     | – 0.103437                                       |
| Cancer                     | No                   | 0                     | + 0                                              |
|                            |                      | —                     | —                                                |
| Total                      |                      | 30                    | 10.0168                                          |

<sup>a</sup>Low=trace, mild or moderate.

10-year risk estimates for two approaches:

Exact ( $x'_i\beta$ ) approach:  $P(10 \text{ yr mortality}) = 1 - \exp(-\exp[(\ln(3652.5) - 10.0168)/0.667965]) = \mathbf{6.4\%}$

Point approach: Linear predictor = Adj. intercept – (– *shifted point total* \* S)

$$= 11.52395203 - (30 * 0.05)$$

$$= 10.023952$$

$P(10 \text{ yr mortality}) = 1 - \exp(-\exp[(\ln(3652.5) - 10.02395)/0.667965])$

$$= \mathbf{6.3\%}$$

Example 2: 47.7 year-old male with CVD, an FEV1 of 0.85, BMI of 24.15, sAWT z-score of 0.528, distance walked of 1620 feet, current smoker with 33.7 pack-years, dyspnea score of 0, and ‘low’ visual emphysema score. Calculations would be as follows:

| <u>Predictor</u>           | <u>Subject value</u> | <u>Point approach</u> | <u><math>x'_i\beta</math> approach</u>           |
|----------------------------|----------------------|-----------------------|--------------------------------------------------|
| Intercept                  |                      |                       | 2.734014                                         |
| FEV <sub>1</sub> . % pred. | 0.85                 | 0                     | + 2.456290(0.85)–1.329384(0.85) <sup>2</sup>     |
| Age, years                 | 47.7                 | 0                     | + 0.114866(47.7) – 0.001127(47.7) <sup>2</sup>   |
| BMI, kg/m <sup>2</sup>     | 24.15                | 6                     | + 0.119280(24.15) – 0.001471(24.15) <sup>2</sup> |
| sAWT z-score               | 0.528                | 7                     | – 0.120124(0.528)                                |
| 6MWD, feet                 | 1620                 | 6                     | + 0.000588(1620)                                 |
| Dyspnea score              | 0                    | 0                     | – 0.088768(0)                                    |
| CT visual emphysema        | Low <sup>a</sup>     | 2                     | + 0.169568                                       |
| Current smoking            | Yes                  | 5                     | – 0.234298                                       |
| Pack-years smoking         | 33.7                 | 1                     | – 0.001066(33.7)                                 |
| Diabetes                   | No                   | 0                     | + 0                                              |
| CVD                        | Yes                  | 2                     | – 0.108811                                       |
| Cancer                     | No                   | 0                     | + 0                                              |
|                            |                      | —                     | —                                                |
| Total                      |                      | 29                    | 9.4796                                           |

<sup>a</sup>Low=trace, mild or moderate.

10-year risk estimates for two approaches:

Exact ( $x'_i\beta$ ) approach:  $P(\text{mortality})=1-\exp(-\exp[(\ln(3652.5)-9.4796)/0.684146]) = \mathbf{14.3\%}$

Point approach: Linear predictor = Adj. intercept – (– *shifted point total* \* S)  
 = 10.94352157 – (29\*0.05)  
 = 9.493522

P(10 yr mortality) =  $1-\exp(-\exp[(\ln(3652.5)-9.493522)/0.684146])$   
 = **14.1%**

Note: For both examples, the more decimal places that are kept in the calculation, the greater the accuracy. (Pre-calculation numbers shown above are rounded, but more decimal places were retained in actual calculations.)

## Appendix C. Supplemental tables and figures

**Table S1.** Demographics of COPDGene and SPIROMICS subjects, using sample sizes restricted by full and reduced models (due to missing data for some variables). Entries are Mean (SD) for continuous variables, and % (as indicated) for counts.

| Category      | Variable                         | Full model         |                    | Reduced model      |                     |
|---------------|----------------------------------|--------------------|--------------------|--------------------|---------------------|
|               |                                  | COPDGene<br>n=9074 | SPIROMICS<br>n=846 | COPDGene<br>n=9867 | SPIROMICS<br>n=2630 |
| Outcome       | 6-yr mortality rate <sup>a</sup> | 11.9%              | 10.0%              | 12.7%              | 10.7%               |
|               | Max years followed               | 10.6               | 7.3                | 10.6               | 7.3                 |
| Demographic   | Age, years                       | 59.7 (9.0)         | 64.7 (8.7)         | 59.7 (9.0)         | 63.6 (8.8)          |
|               | BMI, kg/m <sup>2</sup>           | 28.8 (6.2)         | 27.9 (5.2)         | 28.9 (6.3)         | 27.9 (5.3)          |
|               | Males                            | 53.1%              | 55.2%              | 53.0%              | 54.0%               |
| Smoking       | Current smoker                   | 52.1%              | 36.2%              | 52.2%              | 39.6%               |
|               | Pack-years                       | 44.2 (24.8)        | 49.0 (22.7)        | 44.4 (25.0)        | 49.4 (26.0)         |
| Symptoms      | Dyspnea score                    |                    |                    |                    |                     |
|               | 0 (Low)                          | 45.1%              | 34.3%              | 44.3%              | 31.4%               |
|               | 1                                | 14.2%              | 42.9%              | 13.8%              | 43.0%               |
|               | 2                                | 13.0%              | 13.6%              | 13.0%              | 15.0%               |
|               | 3                                | 18.1%              | 7.1%               | 18.7%              | 8.3%                |
|               | 4 (High)                         | 9.6%               | 2.1%               | 10.3%              | 2.4%                |
| Lung function | FEV <sub>1</sub> , % predicted   | 76.9 (25.2)        | 72.9 (25.7)        | 76.2 (25.5)        | 73.0 (26.3)         |
|               | FEV <sub>1</sub> /FVC, %         | 66.9 (15.9)        | 59.8 (16.4)        | 66.6 (16.2)        | 60.0 (16.6)         |
|               | GOLD group                       |                    |                    |                    |                     |
|               | PRISm                            | 12.2%              | 2.8%               | 12.4%              | 2.6%                |
|               | 0                                | 43.7%              | 28.4%              | 43.1%              | 30.6%               |
|               | 1                                | 8.1%               | 16.6%              | 7.8%               | 14.7%               |
|               | 2                                | 19.3%              | 30.1%              | 19.1%              | 29.8%               |
|               | 3                                | 11.4%              | 17.0%              | 11.5%              | 15.7%               |
|               | 4                                | 5.4%               | 5.1%               | 6.1%               | 6.7%                |
| CT            | Visual presence of emphysema     | 66.5%              | 91.4%              |                    |                     |
|               | sAWT <sup>b</sup> , mm           | 1.1 (0.23)         | 1.5 (0.13)         |                    |                     |
| Exercise      | 6MWD, feet                       | 1361.8 (395.0)     | 1347.0 (380.5)     |                    |                     |
| Comorbidities | Diabetes                         | 12.8%              | 12.7%              | 13.2%              | 13.4%               |
|               | CVD                              | 49.1%              | 59.0%              | 49.4%              | 58.2%               |
|               | Cancer                           | 5.0%               | 12.3%              | 5.0%               | 11.3%               |

<sup>a</sup>Based on Kaplan-Meier estimates, to account for those lost to follow-up; 6-year estimates chosen so that comparisons could be made between cohorts.

<sup>b</sup>Thirona used for COPDGene, VIDA for SPIROMICS. Note that a subset of subjects in COPDGene also had VIDA measurements, for which the mean and SD were similar to that of SPIROMICS; Thirona measurements were used for COPDGene due to greater availability of data, whereas VIDA was the only approach used in SPIROMICS. **Abbreviations:** BMI – body mass index; CVD – cardiovascular disease; FEV<sub>1</sub> – forced expiratory volume in 1 second; GOLD – Global initiative for chronic Obstructive Lung Disease; PRISm – Preserved ratio and impaired spirometry; sAWT – mean segmental airway wall thickening; SD – standard deviation; 6MWD – 6-minute walk distance.

**Table S2.** Demographics of SPIROMICS subjects used for validation in full and reduced models, by gender. Differences in sample sizes between full and reduced models was due to missing data for some variables. Entries are Mean (SD) for continuous variables, and % (as indicated) for counts.

| Category      | Variable                         | Full model        |                   | Reduced model |             |
|---------------|----------------------------------|-------------------|-------------------|---------------|-------------|
|               |                                  | Women<br>379      | Men<br>467        | Women<br>1211 | Men<br>1419 |
| Outcome       | 6-yr mortality rate <sup>a</sup> | 7.3%              | 12.8%             | 9.1%          | 12.2%       |
|               | Max years followed               | 7.3               | 7.3               | 7.3           | 7.3         |
| Demographic   | Age, years                       | 64.2 (9.1)        | 65.0 (8.4)        | 63.0 (9.0)    | 64.1 (8.6)  |
|               | BMI, kg/m <sup>2</sup>           | 27.5 (5.6)        | 28.2 (4.9)        | 27.8 (5.7)    | 28.0 (4.9)  |
| Smoking       | Current smoker                   | 38.5%             | 34.3%             | 41.5%         | 38.1%       |
|               | Pack-years                       | 45.2 (20.2)       | 52.0 (24.2)       | 45.4 (20.3)   | 52.8 (29.7) |
| Symptoms      | Dyspnea score                    |                   |                   |               |             |
|               | 0 (Low)                          | 29.6%             | 38.1%             | 26.6%         | 35.5%       |
|               | 1                                | 44.1%             | 42.0%             | 44.3%         | 41.9%       |
|               | 2                                | 17.4%             | 10.5%             | 19.0%         | 11.6%       |
|               | 3                                | 6.9%              | 7.3%              | 7.7%          | 8.7%        |
|               | 4 (High)                         | 2.1%              | 2.1%              | 2.5%          | 2.3%        |
| Lung function | FEV <sub>1</sub> , % predicted   | 72.9 (25.6)       | 72.9 (25.8)       | 74.0 (25.8)   | 72.2 (26.8) |
|               | FEV <sub>1</sub> /FVC, %         | 61.7 (16.7)       | 58.3 (16.1)       | 62.0 (16.2)   | 58.2 (16.7) |
|               | GOLD group                       |                   |                   |               |             |
|               | PRISm                            | 4.2%              | 1.7%              | 3.5%          | 1.9%        |
|               | 0                                | 32.5%             | 25.1%             | 35.0%         | 26.8%       |
|               | 1                                | 13.7%             | 18.8%             | 11.7%         | 17.2%       |
|               | 2                                | 25.9%             | 33.6%             | 28.3%         | 31.0%       |
|               | 3                                | 19.0%             | 15.4%             | 16.4%         | 15.1%       |
| 4             | 4.8%                             | 5.4%              | 5.0%              | 8.0%          |             |
| CT            | Visual presence of emph.         | 90.0%             | 92.5%             |               |             |
|               | sAWT <sup>b</sup> , mm           | 1.4 (0.09)        | 1.6 (0.10)        |               |             |
| Exercise      | 6MWD, feet                       | 1290.4<br>(374.8) | 1392.9<br>(379.2) |               |             |
| Comorbidities | Diabetes                         | 11.1%             | 13.9%             | 11.7%         | 14.8%       |
|               | CVD                              | 58.1%             | 59.7%             | 56.9%         | 59.3%       |
|               | Cancer                           | 11.6%             | 12.9%             | 11.6%         | 11.1%       |

<sup>a</sup>Based on Kaplan-Meier estimates, to account for those lost to follow-up.

<sup>b</sup>VIDA used for SPIROMICS.

**Abbreviations:** BMI – body mass index; CVD – cardiovascular disease; FEV<sub>1</sub> – forced expiratory volume in 1 second; GOLD – Global initiative for chronic Obstructive Lung Disease; mMRC – modified Medical Research Council; PRISm – Preserved ratio and impaired spirometry; sAWT – mean segmental airway wall thickening; SD – standard deviation; 6MWD – 6-minute walk distance.

**Table S3.** Parameter estimates for Weibull models, using full set of predictors. Increasing parameter estimate values increase survival likelihood. These estimates provide a more accurate way of determining subject risk of mortality based on the fitted model. For examples, see Appendix B.

| Parameter                                      | Women     |        |        |         | Men       |        |        |         |
|------------------------------------------------|-----------|--------|--------|---------|-----------|--------|--------|---------|
|                                                | Estimate  | SE     | Chi-Sq | P-value | Estimate  | SE     | Chi-Sq | P-value |
| <b>Intercept</b>                               | 5.468337  | 1.3634 | 16.09  | <.0001  | 2.734014  | 1.1832 | 5.34   | 0.0208  |
| <b>6MDW, feet</b>                              | 0.000681  | 0.0001 | 57.55  | <.0001  | 0.000588  | 0.0001 | 72.94  | <.0001  |
| <b>Current smoker<sup>a</sup></b>              | -0.330043 | 0.0722 | 20.87  | <.0001  | -0.234298 | 0.0584 | 16.12  | <.0001  |
| <b>FEV<sub>1</sub>, % of pred.</b>             | 2.680588  | 0.5392 | 24.71  | <.0001  | 2.456290  | 0.4281 | 32.93  | <.0001  |
| <b>FEV<sub>1</sub><sup>2</sup>, % of pred.</b> | -1.111010 | 0.4030 | 7.60   | 0.0058  | -1.329380 | 0.3149 | 17.82  | <.0001  |
| <b>Age, years</b>                              | 0.039362  | 0.0425 | 0.86   | 0.3542  | 0.114866  | 0.0351 | 10.69  | 0.0011  |
| <b>Age<sup>2</sup>, years</b>                  | -0.000529 | 0.0003 | 2.51   | 0.1134  | -0.001127 | 0.0003 | 16.60  | <.0001  |
| <b>BMI, kg/m<sup>2</sup></b>                   | 0.094463  | 0.0234 | 16.29  | <.0001  | 0.119280  | 0.0269 | 19.70  | <.0001  |
| <b>BMI<sup>2</sup>, kg/m<sup>2</sup></b>       | -0.001205 | 0.0004 | 11.05  | 0.0009  | -0.001471 | 0.0004 | 11.30  | 0.0008  |
| <b>Dyspnea score</b>                           | -0.082935 | 0.0255 | 10.59  | 0.0011  | -0.088830 | 0.0202 | 19.41  | <.0001  |
| <b>sAWT, z-score</b>                           | -0.085056 | 0.0365 | 5.42   | 0.0199  | -0.120124 | 0.0295 | 16.63  | <.0001  |
| <b>Visual emphysema<sup>b</sup></b>            |           |        |        |         |           |        |        |         |
| <b>None</b>                                    | 0.342787  | 0.1095 | 9.80   | 0.0017  | 0.269973  | 0.0901 | 8.97   | 0.0027  |
| <b>Low</b>                                     | 0.193291  | 0.0753 | 6.58   | 0.0103  | 0.169568  | 0.0612 | 7.67   | 0.0056  |
| <b>High</b>                                    | 0         |        |        |         | 0         |        |        |         |
| <b>Diabetes<sup>a</sup></b>                    | -0.168710 | 0.0865 | 3.80   | 0.0511  | -0.190287 | 0.0617 | 9.51   | 0.0020  |
| <b>CVD<sup>a</sup></b>                         | -0.103437 | 0.0601 | 2.96   | 0.0854  | -0.108811 | 0.0501 | 4.72   | 0.0297  |
| <b>Cancer<sup>a</sup></b>                      | -0.241954 | 0.1070 | 5.11   | 0.0238  | -0.161668 | 0.0804 | 4.04   | 0.0445  |
| <b>Pack-years</b>                              | -0.002588 | 0.0011 | 5.25   | 0.0219  | -0.001066 | 0.0008 | 1.89   | 0.1692  |
| <b>Scale<sup>c</sup></b>                       | 0.667965  | 0.0252 | -      | -       | 0.684146  | 0.0205 | -      | -       |

<sup>a</sup>Indicator variable for stated condition.

<sup>b</sup>Low=trace, mild or moderate; High=confluent or advanced destructive.

<sup>c</sup>The Weibull shape parameter for this model is the inverse of the scale parameter.

Abbreviations: BMI – body mass index; CVD – cardiovascular disease; FEV<sub>1</sub> – forced expiratory volume in 1 second; sAWT – mean segmental airway wall thickening; 6MWD – 6-minute walk distance.

**Table S4.** Parameter estimates for Weibull models, using reduced set of predictors. Increasing parameter estimate values increase survival likelihood.

| Parameter                                      | Women     |        |        |         | Men       |        |        |         |
|------------------------------------------------|-----------|--------|--------|---------|-----------|--------|--------|---------|
|                                                | Estimate  | SE     | Chi-Sq | P-value | Estimate  | SE     | Chi-Sq | P-value |
| <b>Intercept</b>                               | 6.306427  | 1.3518 | 21.76  | <.0001  | 2.916401  | 1.1322 | 6.63   | 0.0100  |
| <b>Current smoker<sup>a</sup></b>              | -0.406114 | 0.0669 | 36.87  | <.0001  | -0.326372 | 0.0532 | 37.67  | <.0001  |
| <b>FEV<sub>1</sub>, % of pred.</b>             | 4.418283  | 0.5087 | 75.44  | <.0001  | 3.471928  | 0.3990 | 75.70  | <.0001  |
| <b>FEV<sub>1</sub><sup>2</sup>, % of pred.</b> | -1.955450 | 0.3816 | 26.27  | <.0001  | -1.649120 | 0.2977 | 30.68  | <.0001  |
| <b>BMI, kg/m<sup>2</sup></b>                   | 0.082303  | 0.0218 | 14.26  | 0.0002  | 0.141649  | 0.0245 | 33.30  | <.0001  |
| <b>BMI<sup>2</sup>, kg/m<sup>2</sup></b>       | -0.001119 | 0.0003 | 10.85  | 0.0010  | -0.001995 | 0.0004 | 25.46  | <.0001  |
| <b>Age, years</b>                              | 0.050555  | 0.0419 | 1.46   | 0.2276  | 0.124480  | 0.0336 | 13.70  | 0.0002  |
| <b>Age<sup>2</sup>, years</b>                  | -0.000696 | 0.0003 | 4.48   | 0.0343  | -0.001236 | 0.0003 | 21.71  | <.0001  |
| <b>Dyspnea score</b>                           | -0.167368 | 0.0246 | 46.11  | <.0001  | -0.144363 | 0.0189 | 58.27  | <.0001  |
| <b>Diabetes<sup>a</sup></b>                    | -0.164885 | 0.0834 | 3.91   | 0.0480  | -0.208005 | 0.0597 | 12.15  | 0.0005  |
| <b>CVD<sup>a</sup></b>                         | -0.176855 | 0.0591 | 8.96   | 0.0028  | -0.105932 | 0.0486 | 4.75   | 0.0294  |
| <b>Cancer<sup>a</sup></b>                      | -0.134860 | 0.1097 | 1.51   | 0.2190  | -0.186861 | 0.0787 | 5.64   | 0.0175  |
| <b>Pack-years</b>                              | -0.003300 | 0.0011 | 8.81   | 0.0030  | -0.002204 | 0.0007 | 8.69   | 0.0032  |
| <b>Scale<sup>b</sup></b>                       | 0.707303  | 0.0249 | -      | -       | 0.707654  | 0.0200 | -      | -       |

<sup>a</sup>Indicator variable for stated condition.

<sup>b</sup>The Weibull shape parameter for this model is the inverse of the scale parameter.

Abbreviations: BMI – body mass index; CVD – cardiovascular disease; FEV<sub>1</sub> – forced expiratory volume in 1 second.



**Table S5.** Converting regression coefficients and predictors into points, for full and reduced models (full model points are the same as in Table 2; they are presented here for comparison). For a subject with given characteristics, determine points associated with each predictor and then add for a total score. The risk of death within 10 years can then be computed based on the total score. For intervals of continuous variables, the closed bracket includes the value, while the open bracket does not. For example, [50, 55) means at least 50 but less than 55.

| Category     | Risk factor            | Level      | Full     |    | Re-duced   |              | Category       | Risk factor  | Level         | Full                           |      | Re-duced |    |
|--------------|------------------------|------------|----------|----|------------|--------------|----------------|--------------|---------------|--------------------------------|------|----------|----|
|              |                        |            | W        | M  | W          | M            |                |              |               | W                              | M    | W        | M  |
| Demo-graphic | Age, years             | <50        | 0        | 0  | 0          | 0            | Lung function  | FEV1, % pred | <20%          | 24                             | 16   | 37       | 27 |
|              |                        | [50, 55)   | 1        | 0  | 2          | 0            |                |              | [20, 30)      | 19                             | 12   | 30       | 21 |
|              |                        | [55, 60)   | 3        | 1  | 5          | 1            |                |              | [30, 40)      | 15                             | 9    | 23       | 16 |
|              |                        | [60, 65)   | 6        | 3  | 8          | 3            |                |              | [40, 50)      | 12                             | 6    | 17       | 12 |
|              |                        | [65, 70)   | 9        | 6  | 12         | 7            |                |              | [50, 60)      | 9                              | 4    | 12       | 8  |
|              |                        | [70, 75)   | 12       | 10 | 16         | 12           |                |              | [60, 70)      | 6                              | 2    | 8        | 5  |
|              |                        | [75, 80)   | 16       | 16 | 22         | 18           |                |              | [70, 80)      | 4                              | 1    | 5        | 3  |
|              |                        | ≥80        | 21       | 22 | 28         | 25           |                |              | [80, 90)      | 2                              | 0    | 2        | 1  |
|              | BMI, kg/m <sup>2</sup> | <20        | 11       | 15 | 8          | 12           |                |              | ≥90           | 0                              | 0    | 0        | 0  |
|              |                        | [20, 24)   | 7        | 10 | 5          | 7            |                |              | CT            | Visual emphy-sema <sup>a</sup> | None | 0        | 0  |
|              |                        | [24, 28)   | 4        | 6  | 3          | 3            |                |              |               |                                | Low  | 3        | 2  |
|              |                        | [28, 32)   | 2        | 3  | 1          | 1            |                |              |               |                                | High | 7        | 5  |
|              |                        | [32, 36)   | 1        | 1  | 0          | 0            |                |              | sAWT, z-score | < -1.5                         | 0    | 0        |    |
|              |                        | [36, 40)   | 0        | 0  | 0          | 0            |                |              |               | [-1.5, -0.5)                   | 2    | 2        |    |
| [40, 44)     |                        | 0          | 0        | 1  | 1          | [-0.5, 0.5)  | 3              | 5            |               |                                |      |          |    |
| [44, 48)     | 1                      | 1          | 2        | 4  | [0.5, 1.5) | 5            | 7              |              |               |                                |      |          |    |
| ≥48          | 3                      | 2          | 4        | 8  | ≥1.5       | 7            | 10             |              |               |                                |      |          |    |
| Smoking      | Current smoker         | Yes        | 7        | 5  | 8          | 7            | Exercise       | 6MWD, feet   | <500          | 24                             | 21   |          |    |
|              |                        | Pack-years | [10, 25) | 1  | 0          | 1            |                |              | 1             | [500, 750)                     | 20   | 18       |    |
|              | [25, 50)               |            | 2        | 1  | 2          | 2            |                |              | [750, 1000)   | 17                             | 15   |          |    |
|              | [50, 75)               |            | 3        | 1  | 4          | 3            |                |              | [1000, 1250)  | 14                             | 12   |          |    |
|              | [75, 100)              |            | 5        | 2  | 6          | 4            |                |              | [1250, 1500)  | 10                             | 9    |          |    |
|              | ≥100                   | 6          | 2        | 7  | 5          | [1500, 1750) |                |              | 7             | 6                              |      |          |    |
| Symptoms     | Dyspnea score          | 0 (Low)    | 0        | 0  | 0          | 0            | [1750, 2000)   | 3            | 3             |                                |      |          |    |
|              |                        | 1          | 2        | 2  | 3          | 3            | ≥2000          | 0            | 0             |                                |      |          |    |
|              |                        | 2          | 3        | 4  | 7          | 6            | Comor-bidities | Diabetes     | 3             | 4                              | 3    | 4        |    |
|              |                        | 3          | 5        | 5  | 10         | 9            |                |              | CVD           | 2                              | 2    | 4        | 2  |
|              |                        | 4 (High)   | 7        | 7  | 13         | 12           |                |              |               | Cancer                         | 5    | 3        | 3  |

<sup>a</sup>Low=trace, mild or moderate; High=confluent or advanced destructive.

**Abbreviations:** BMI – body mass index; CVD – cardiovascular disease; FEV<sub>1</sub> – forced expiratory volume in 1 second; sAWT – mean segmental airway wall thickening; 6MWD – 6-minute walk distance.

**Table S6.** Risk estimates associated with Point totals for reduced model (see Table S5).

| Point | Women | Men   | Point | Women | Men   |
|-------|-------|-------|-------|-------|-------|
| 0     | 1.6%  | 4.6%  | 38    | 21.4% | 49.8% |
| 1     | 1.7%  | 4.9%  | 39    | 22.7% | 52.3% |
| 2     | 1.9%  | 5.3%  | 40    | 24.2% | 54.8% |
| 3     | 2.0%  | 5.7%  | 41    | 25.7% | 57.4% |
| 4     | 2.1%  | 6.1%  | 42    | 27.3% | 59.9% |
| 5     | 2.3%  | 6.5%  | 43    | 29.0% | 62.5% |
| 6     | 2.5%  | 6.9%  | 44    | 30.7% | 65.1% |
| 7     | 2.7%  | 7.4%  | 45    | 32.6% | 67.7% |
| 8     | 2.8%  | 7.9%  | 46    | 34.5% | 70.3% |
| 9     | 3.0%  | 8.5%  | 47    | 36.5% | 72.8% |
| 10    | 3.3%  | 9.1%  | 48    | 38.6% | 75.3% |
| 11    | 3.5%  | 9.7%  | 49    | 40.7% | 77.7% |
| 12    | 3.8%  | 10.4% | 50    | 43.0% | 80.0% |
| 13    | 4.0%  | 11.1% | 51    | 45.3% | 82.2% |
| 14    | 4.3%  | 11.9% | 52    | 47.6% | 84.4% |
| 15    | 4.6%  | 12.7% | 53    | 50.1% | 86.3% |
| 16    | 4.9%  | 13.6% | 54    | 52.5% | 88.2% |
| 17    | 5.3%  | 14.5% | 55    | 55.0% | 89.9% |
| 18    | 5.7%  | 15.5% | 56    | 57.6% | 91.5% |
| 19    | 6.1%  | 16.5% | 57    | 60.2% | 92.9% |
| 20    | 6.5%  | 17.6% | 58    | 62.8% | 94.1% |
| 21    | 7.0%  | 18.7% | 59    | 65.4% | 95.2% |
| 22    | 7.5%  | 20.0% | 60    | 68.0% | 96.2% |
| 23    | 8.0%  | 21.3% | 61    | 70.5% | 97.0% |
| 24    | 8.5%  | 22.6% | 62    | 73.1% | 97.7% |
| 25    | 9.1%  | 24.1% | 63    | 75.5% | 98.2% |
| 26    | 9.8%  | 25.6% | 64    | 77.9% | 98.7% |
| 27    | 10.5% | 27.2% | 65    | 80.2% | 99.0% |
| 28    | 11.2% | 28.8% | 66    | 82.5% | 99.3% |
| 29    | 11.9% | 30.6% | 67    | 84.6% | 99.5% |
| 30    | 12.8% | 32.4% | 68    | 86.5% | 99.7% |
| 31    | 13.6% | 34.3% | 69    | 88.4% | 99.8% |
| 32    | 14.6% | 36.3% | 70    | 90.1% | 99.9% |
| 33    | 15.5% | 38.4% | 71    | 91.6% | 99.9% |
| 34    | 16.6% | 40.5% | 72    | 93.0% |       |
| 35    | 17.7% | 42.8% | 73    | 94.2% |       |
| 36    | 18.8% | 45.1% | 74    | 95.3% |       |
| 37    | 20.1% | 47.4% | 75    | 96.3% |       |

**Figure S1.** Probability plots for the Weibull full predictive model, for (a) women, and (b) men. The plots show good fits for the empirical approach (K-M estimates, circles), relative to the Weibull model (line in middle, with 95% confidence bands shaded). Only a small handful of points are not within the confidence bands at early days followed, out of over 9,000 points modeled.

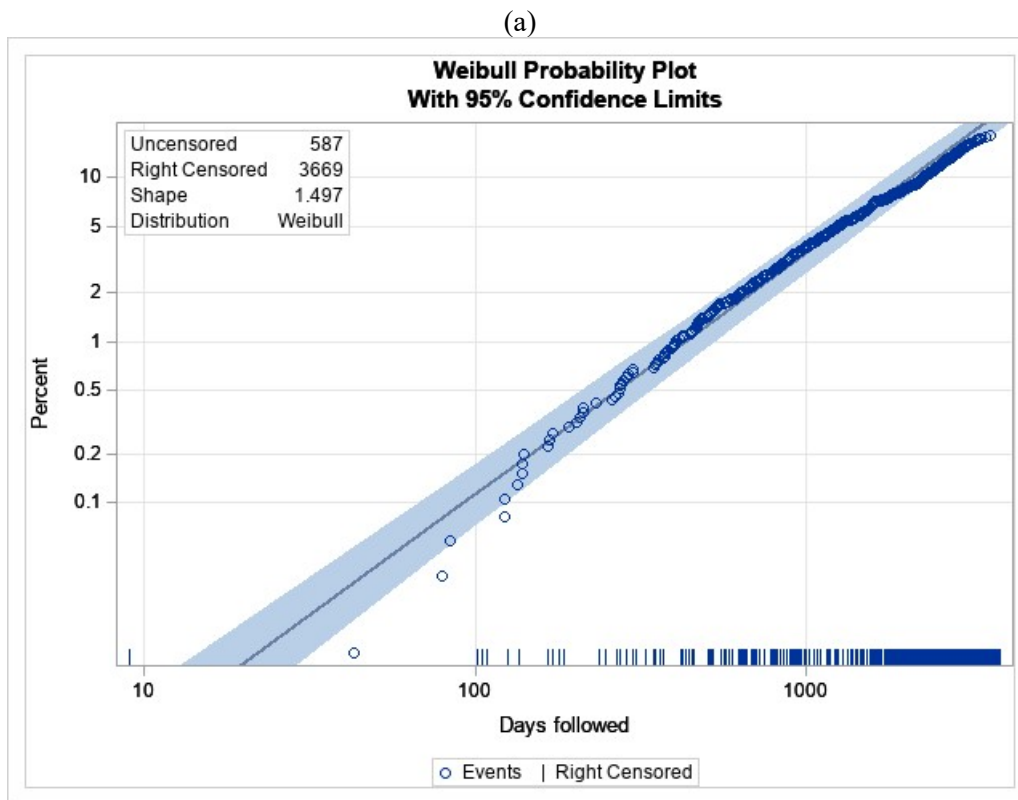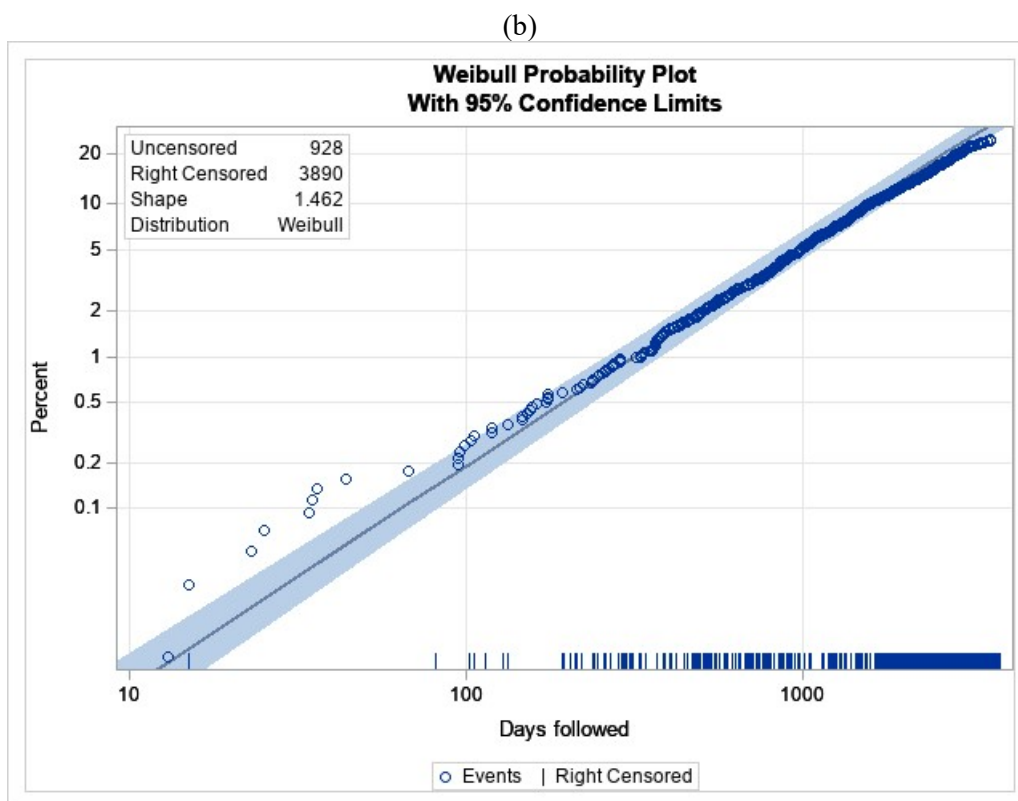

**Figure S2.** Survival (1–risk) estimates for the parametric survival model with Weibull distribution (y-axis) versus the proportional hazards (Cox) survival model (x-axis) for (a) women and (b) men. Survival estimates were computed at the last day of follow-up for subjects. Graphs show high consistency between approaches.

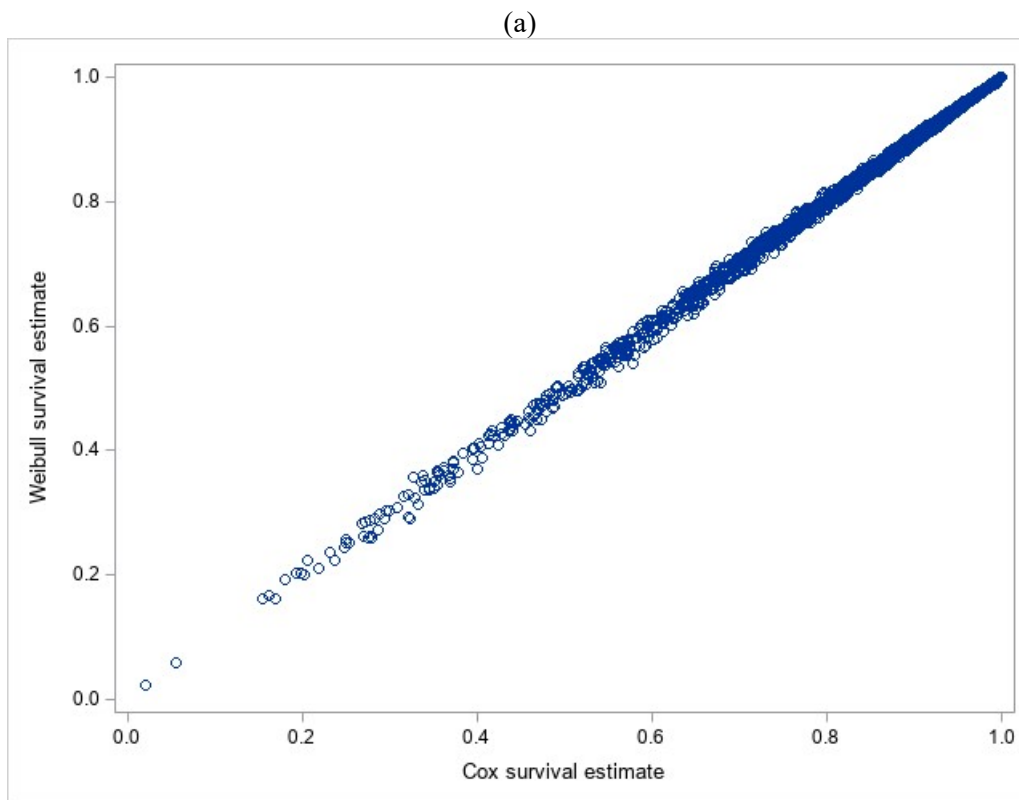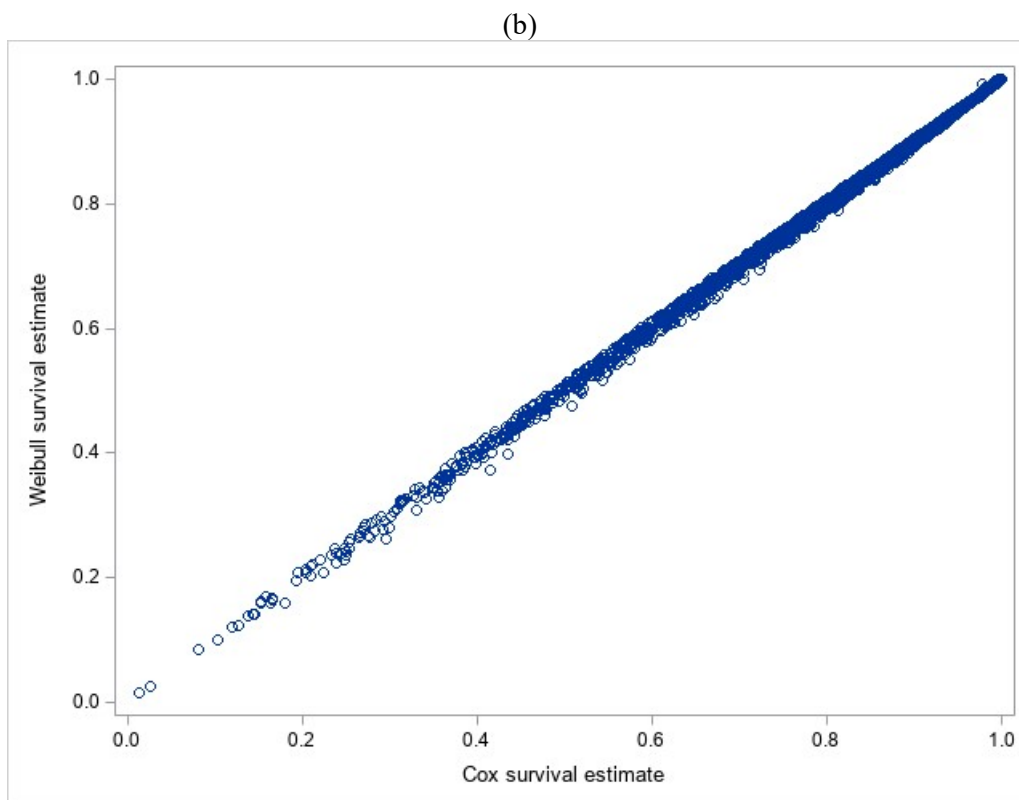

Supplement: JCOPDF-7-346-s001.pdf [file JCOPDF-7-346-s001.pdf]
